# Supplementary material
Source: Royal Society of Chemistry journal article supplement (doi:10.1039/d6lf00075d)
Supplement: d6lf00075d1.pdf [file d6lf00075d1.pdf]

## Supporting information

# Synergistic Effect of WO<sub>3</sub> on Physico-chemical, Physico-mechanical, Hydrophobic, and Anticorrosive Performance of Poly-(*melamine-co-formaldehyde*)-Cured *Pithecellobium dulce*-Alkyd Nanocomposite Coatings

Abu Darda<sup>1\*</sup>, Nitya Nand Gosvami<sup>1</sup>, Weqar Ahmad Siddiqi<sup>2</sup>

<sup>1</sup>*Department of Materials Science and Engineering, Indian Institute of Technology, Delhi*

<sup>2</sup>*Department of Applied Sciences and Humanities, Jamia Millia Islamia, New Delhi-110025, India*

**Number of pages: 5 (S-1 to S-6)**

**Number of Figures: 2 (S-1 and S-2)**

**Number of tables: 4 (S-1 to S-4)**

**Number of Section: 1 (S-1)**

### Section S-1. FTIR Spectroscopic Analysis of WO<sub>3</sub> Nanoparticles

The FT-IR spectrum of WO<sub>3</sub> nanoparticles, as shown in Figure S-1, displays characteristic peaks at 940.90 cm<sup>-1</sup> and 678.84 cm<sup>-1</sup> corresponding to the asymmetric and symmetric stretching vibrations of crystalline W=O and O-W-O bonds, respectively. Additionally, the peak observed at 1626.74 cm<sup>-1</sup> is attributed to the presence of hydroxyl groups bonded to tungsten atoms, while the peak at 3444.01 cm<sup>-1</sup> is likely due to surface moisture associated with these hydroxyl groups. These observations confirm the successful formation of WO<sub>3</sub> nanoparticles (Figure S-1) [1–4].

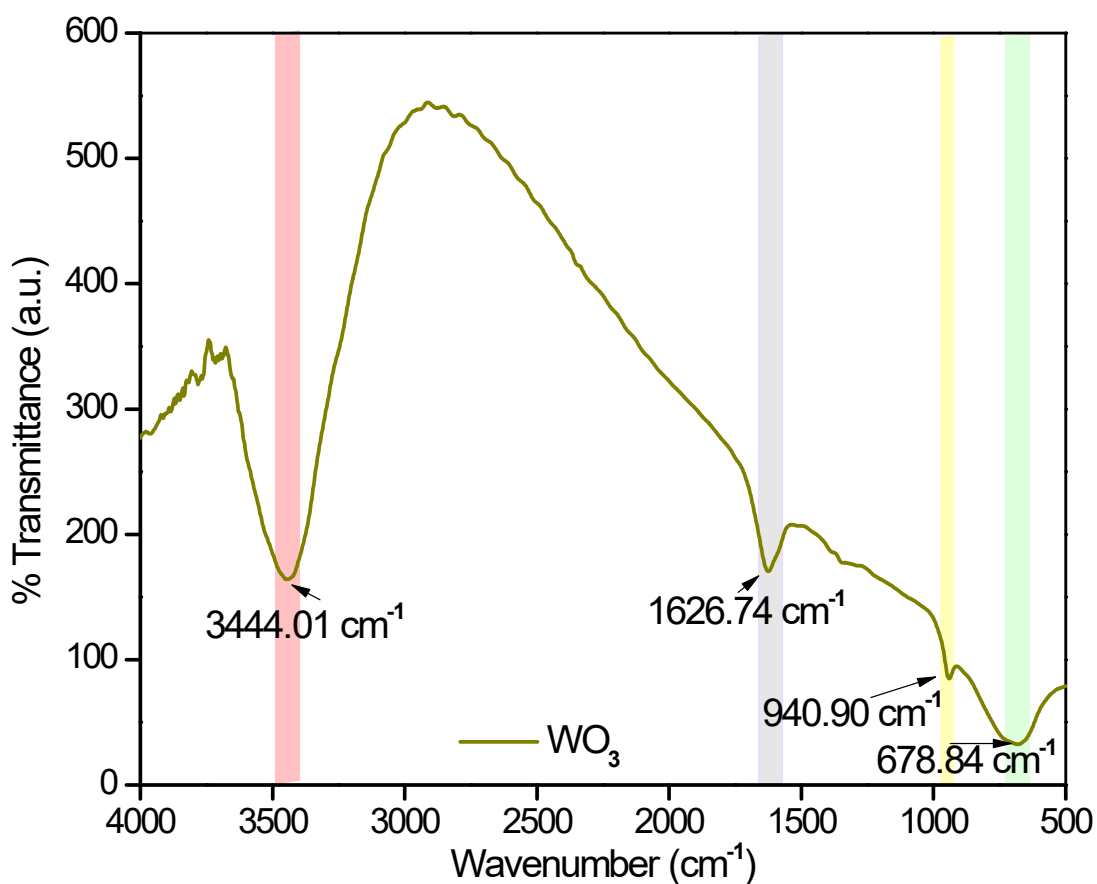

**Figure S-1** FTIR spectra confirming the functional characteristics of WO<sub>3</sub> nanoparticles.

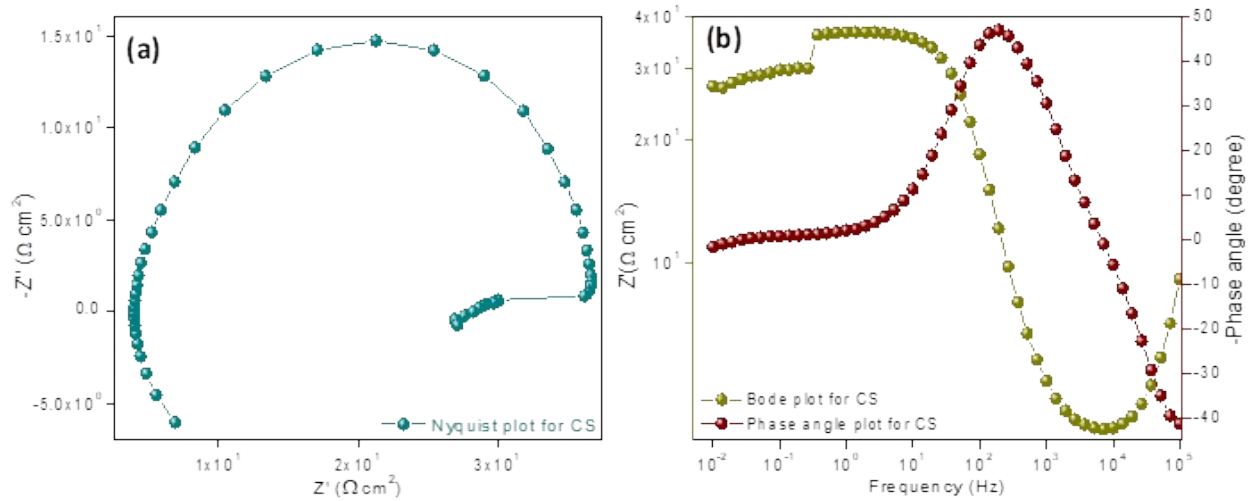

**Figure S-2** (a) Nyquist and (b) [Bode and phase angle] plots of uncoated carbon steel (CS) in 5 wt.% NaCl solution.

**Table S-1** Physico-chemical parameters of PDA, PDA-PMF<sub>80</sub>, and WO<sub>3</sub>@PDA-PMF<sub>80</sub> nanocomposite coatings.

| Resin Code                     | PDA   | PDA-PMF <sub>80</sub> | WO <sub>3</sub> @PDA-PMF <sub>80</sub> |
|--------------------------------|-------|-----------------------|----------------------------------------|
| Acid value (mg KOH/g)          | 0.025 | 0.019                 | 0.011                                  |
| Refractive Index (25°C)        | 1.471 | 1.495                 | 1.513                                  |
| Specific gravity (g/ml at 25C) | 1.09  | 1.13                  | 1.25                                   |

**Table S-2** Physico-mechanical parameters of PDA, PDA-PMF<sub>80</sub>, and WO<sub>3</sub>@PDA-PMF<sub>80</sub> nanocomposite coatings.

| Properties/Coating's Codes | PDA    | PDA-PMF <sub>80</sub> | WO <sub>3</sub> @PDA-PMF <sub>80</sub> |
|----------------------------|--------|-----------------------|----------------------------------------|
| Bend test (1/8'' inch)     | passed | passed                | Passed                                 |
| Coating thickness (μm)     | 85     | 89                    | 91                                     |
| Cross hatch test           | Passed | Passed                | Passed                                 |
| DTH time (h)               | 48     | 30                    | 24                                     |
| DTT time (min)             | 54     | 36                    | 30                                     |
| Gloss (45°)                | 68     | 81                    | 83                                     |

|                                                |        |        |        |
|------------------------------------------------|--------|--------|--------|
| <b>Impact test (250, lb.inch<sup>-1</sup>)</b> | passed | passed | Passed |
| <b>Scratch hardness (Kg)</b>                   | 5.5    | 10.5   | 12.0   |

**Table S-3. Comparative thermogravimetric parameters of PDA-PMF<sub>80</sub> and WO<sub>3</sub>@PDA-PMF<sub>80</sub> nanocomposite coatings derived from TGA analysis**

| <b>Thermal Parameters</b>                                         | <b>PDA-PMF<sub>80</sub> (°C)</b> | <b>WO<sub>3</sub>@PDA-PMF<sub>80</sub> (°C)</b> |
|-------------------------------------------------------------------|----------------------------------|-------------------------------------------------|
| Initial decomposition temperature (IDT, °C)                       | ~136                             | ~138                                            |
| Onset degradation temperature, T <sub>onset</sub> (°C)            | ~304                             | ~336                                            |
| Temperature at 5 wt.% loss, T <sub>d5</sub> / T <sub>5</sub> (°C) | ~304                             | ~336                                            |
| First major degradation temperature (°C)                          | ~304                             | ~336                                            |
| Second major degradation temperature (°C)                         | ~428                             | ~465                                            |
| Maximum weight loss (%)                                           | ~85                              | ~78                                             |
| Residual char at 800 °C (%)                                       | ~5                               | ~12                                             |
| Thermal stability behavior                                        | Moderate                         | Enhanced                                        |
| Barrier/char-forming behavior                                     | Lower                            | Higher                                          |
| Overall thermal resistance                                        | Lower                            | Improved due to WO <sub>3</sub> incorporation   |

Where;

IDT = Initial decomposition temperature;

T<sub>onset</sub> = onset degradation temperature;

T<sub>d5</sub> = temperature corresponding to 5 wt.% weight loss.

The higher residual char yield and delayed degradation temperatures observed for WO<sub>3</sub>@PDA-PMF<sub>80</sub> indicate improved thermal stability due to the incorporation of thermally stable WO<sub>3</sub> nanofillers within the polymer matrix.

**Table S-4** Comparison of anticorrosive performance of WO<sub>3</sub>@PDA-PMF<sub>80</sub> nanocomposite coatings with reported systems in the literature.

| Sr No | Coating system                         | Immersion medium | Icorr (Acm <sup>-2</sup> ) | Corrosion rate (mpy)  | Ref. |
|-------|----------------------------------------|------------------|----------------------------|-----------------------|------|
| 1     | WO <sub>3</sub> @PDA-PMF <sub>80</sub> | 5wt% NaCl        | 1.56×10 <sup>-7</sup>      | 4.81×10 <sup>-4</sup> | P.S. |
| 2     | WCA-BMF <sub>80</sub>                  | 5wt% NaCl        | 4.50 ×10 <sup>-7</sup>     | 5.23×10 <sup>-3</sup> | [5]  |
| 3     | Alk-DDS—Ppy-PSCeO <sub>2</sub>         | 1.5 M NaCl       | 3.0×10 <sup>-1</sup>       | 9.85×10 <sup>-1</sup> | [6]  |
| 4     | ASAR/10%SiO <sub>2</sub>               | 3.5wt% NaCl      | 7.03×10 <sup>-7</sup>      | 1.09×10 <sup>-3</sup> | [7]  |
| 5     | NLA-IPTES-III                          | 3.5wt% NaOH      | 7.20×10 <sup>-7</sup>      | 8.00×10 <sup>-4</sup> | [8]  |

## References

- [1] J.R. Xavier, Effect of surface modified WO<sub>3</sub> nanoparticle on the epoxy coatings for the adhesive and anticorrosion properties of mild steel, *Journal of Applied Polymer Science* 137 (2020) 1–10. <https://doi.org/10.1002/app.48323>.
- [2] K. Pandurangarao, V. Ravi Kumar, Preparation and characterization of nanocrystalline tungsten oxide thin films for electrochromic devices: Effect of deposition parameters, *Materials Today: Proceedings* 19 (2019) 2596–2603. <https://doi.org/10.1016/j.matpr.2019.10.093>.
- [3] S.R. Arunima, M.J. Deepa, C. V. Geethanjali, V.S. Saji, S.M.A. Shibli, Tuning of hydrophobicity of WO<sub>3</sub>-based hot-dip zinc coating with improved self-cleaning and anti-corrosion properties, *Applied Surface Science* 527 (2020) 146762. <https://doi.org/10.1016/j.apsusc.2020.146762>.
- [4] A. Darda, H. Khatoon, W.A. Siddiqi, S. Ahmad, Polythiophene enveloped tungsten-oxide hybrid nanofillers dispersed oleo (Pithecellobium Dulce seed oil) polyurethane bi-functional nanocomposite coatings, *Progress in Organic Coatings* 172 (2022) 107038. <https://doi.org/10.1016/J.PORGCOAT.2022.107038>.
- [5] S. Pathan, S. Ahmad, Synthesis, characterization and the effect of the s-triazine ring on physico-mechanical and electrochemical corrosion resistance performance of waterborne castor oil alkyd, *Journal of Materials Chemistry A* 1 (2013) 14227–14238.

<https://doi.org/10.1039/c3ta13126b>.

- [6] M.I. Bakshi, S. Ahmad, In situ synthesis of high-performance 4,4'-diaminodiphenylsulfone modified oleo-alkyd nanocomposite coatings: Role of hybrid nanofillers on physico-mechanical, hydrophobic and corrosion protective performance, *New Journal of Chemistry* 44 (2020) 17924–17937. <https://doi.org/10.1039/d0nj03407j>.
- [7] S. Zhong, J. Li, Y. Cai, L. Yi, Novel surfactant-free waterborne acrylic-silicone modified alkyd hybrid resin coatings containing nano-silica for the corrosion protection of carbon steel, *Polymer-Plastics Technology and Materials* 58 (2019) 866–878. <https://doi.org/10.1080/03602559.2018.1542711>.
- [8] S. Pathan, S. Ahmad, Synergistic Effects of Linseed Oil Based Waterborne Alkyd and 3-Isocyanatopropyl Triethoxysilane: Highly Transparent, Mechanically Robust, Thermally Stable, Hydrophobic, Anticorrosive Coatings, *ACS Sustainable Chemistry and Engineering* 4 (2016) 3062–3075. <https://doi.org/10.1021/acssuschemeng.6b00024>.
